# Supplementary material for: Human Monoclonal Antibodies Broadly Neutralizing against Influenza B Virus
Source: PubMed Central journal article supplement (PMC3567173; doi:10.1371/journal.ppat.1003150), 2013-02-07

# Figure S1

Infection/HuMAb

100

25

6.25

1.5 (µg/ml)

5A7

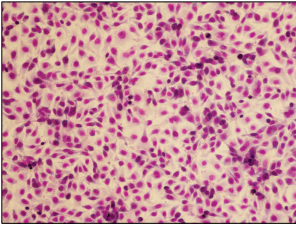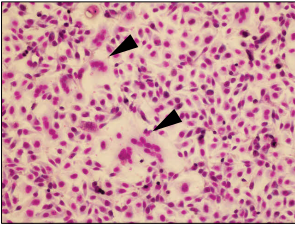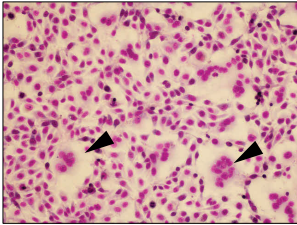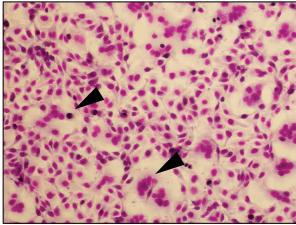

5A7  
(pH 7.0)

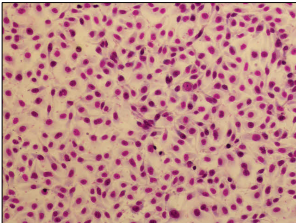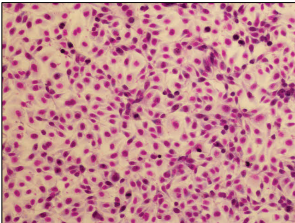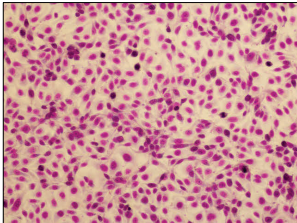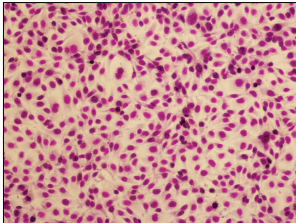

3A2

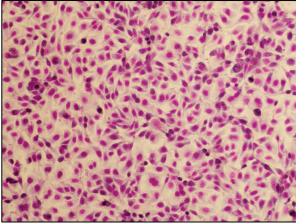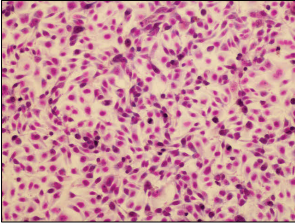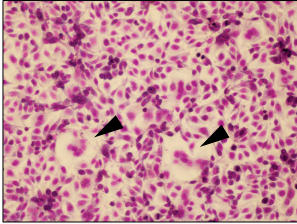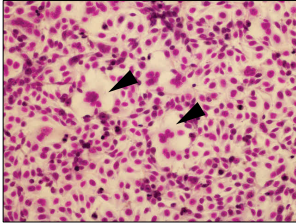

10C4

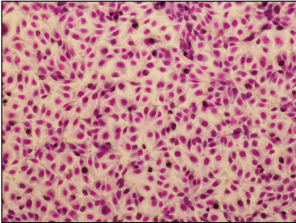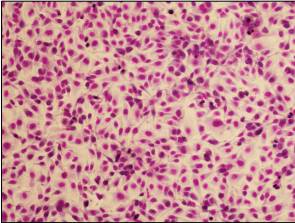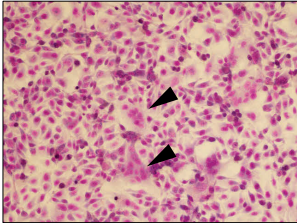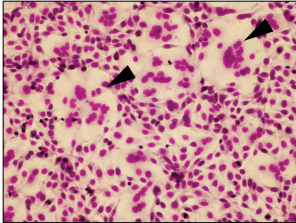

Control IgG  
(D23-1B3B9)

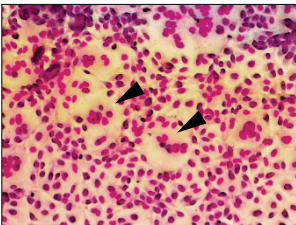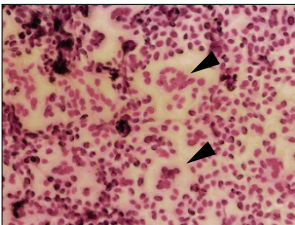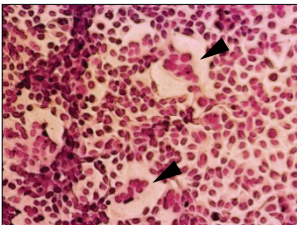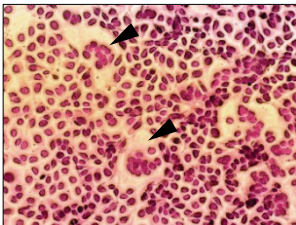

Mock/-

Infection/-

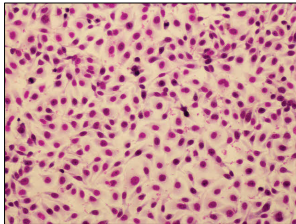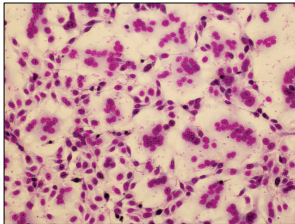

Supplement: ppat.1003150.s001.pdf [file ppat.1003150.s001.pdf]
