# Supplementary material for: Human Monoclonal Antibodies Broadly Neutralizing against Influenza B Virus
Source: PubMed Central journal article supplement (PMC3567173; doi:10.1371/journal.ppat.1003150), 2013-02-07

**Figure S3**

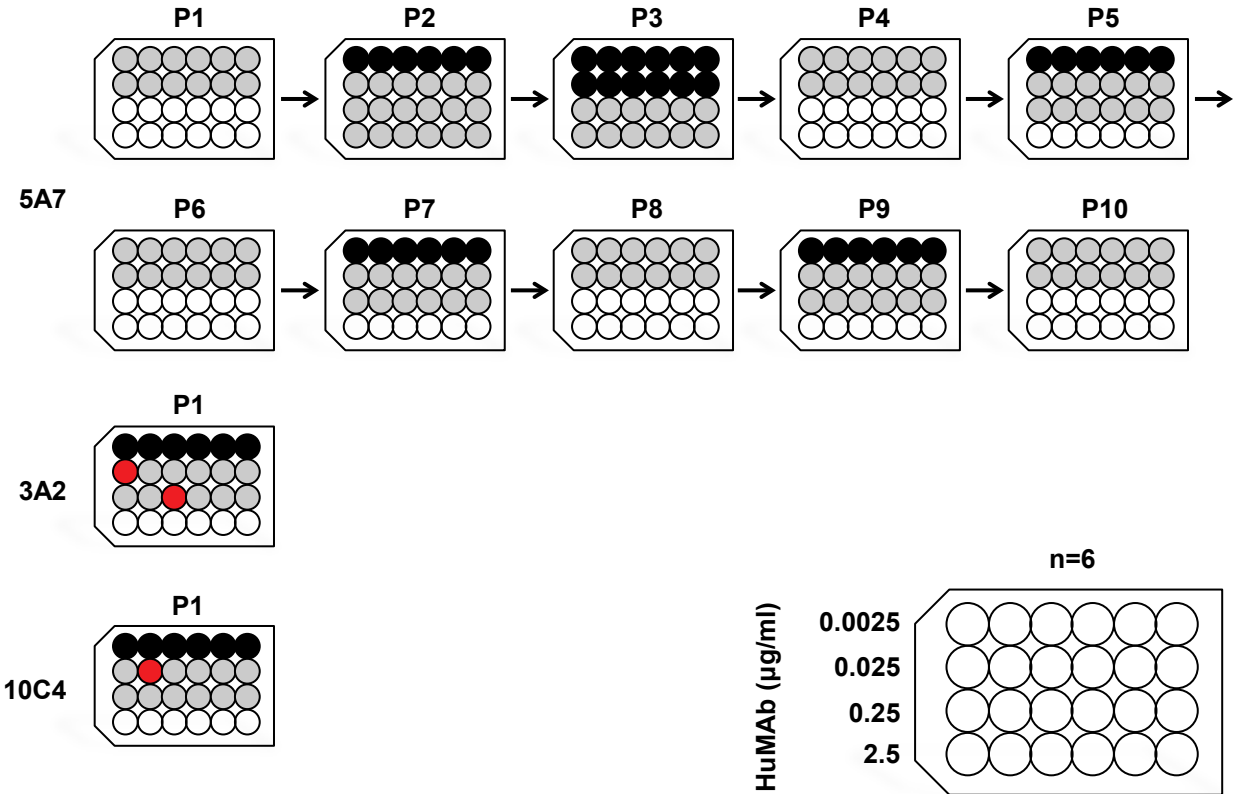

Supplement: ppat.1003150.s003.pdf [file ppat.1003150.s003.pdf]
