# Supplementary material for: Human Monoclonal Antibodies Broadly Neutralizing against Influenza B Virus
Source: PubMed Central journal article supplement (PMC3567173; doi:10.1371/journal.ppat.1003150), 2013-02-07
Supplement: ppat.1003150.s004.pdf [file ppat.1003150.s004.pdf]

# Figure S4

```
B_Florida_HA.gpt 1:DRICTGITSSNSPHVVKATATQGEVNVTVGVIPLTTTPTKSYFANLKGTRTRGKLCPDCLNC 60
3A2_Esc.gpt      :-RICTGITSSNSPHVVKATATQGEVNVTVGVIPLTTTPTKSYFANLKGTRTRGKLCPDCLNC
10C4_Esc.gpt     :DRICTGITSSNSPHVVKATATQGEVNVTVGVIPLTTTPTKSYFANLKGTRTRGKLCPDCLNC

61:TDLDVALGRPMC VGTTPSAKASILHEVKPVTSGCFPIMHDRTKIRQLPNLLRGYENIRLS 120
:TDLDVALGRPMC VGTTPSAKASILHEVKPVTSGCFPIMHDRTKIRQLPNLLRGYENIRLS
:TDLDVALGRPMC VGTTPSAKASILHEVKPVTSGCFPIMHDRTKIRQLPNLLRGYENIRLS

121:TQNVIDAEKAPGGPYRLGTSGSCP NATSKSGFFATMAWAVPKDNNKNATNPLTVEVPYIC 178
:TQNVIDAEKAPGGPYRLGTSGSCP NATSKSGFFATMAWAVPKDNNKNATNPLTVEVPYIC
:TQNVIDAEKAPGGPYRLGTSGSCP NATSKSGFFATMAWAVPKDNNKNATNPLTVEVPYIC

179:TEGEDQITVWGFHSDDKTQMKNLYGDSNPQKFTSSANGVTTHYVSQIGSFDPQTEDGGLP 238
:TEGEDQITVWGFHSDNKIQMKNLYGDSNPQKFTSSANGVTTHYVSQIGSFDPQTEDGGLP
:TEGEDQITVWGFHSDNKIQMKNLYGDSNPQKFTSSANGVTTHYVSQIGSFDPQTEDGGLP
      * *

239:QSGRIVVDYMMQKPGKTGTIVYQRGVLLPQKVVWCASGRSKVIKGSPLLIG EADCLHEKYG 298
:QSGRIVVDYMMQKPGKTGTIVYQRGVLLPQKVVWCASGRSKVIKGSPLLIG EADCLHEKYG
:QSGRIVVDYMMQKPGKTGTIVYQRGVLLPQKVVWCASGRSKVIKGSPLLIG EADCLHEKYG

299:GLNKS KPYTGEHAKAIGNCPIWVK TPLKLANGTKYRPPAKLLKERGFFGAIAGFLEGGW 358
:GLNKS KPYTGEHAKAIGNCPIWVK TPLKLANGTKYRPPAKLLKERGFFGAIAGFLEGGW
:GLNKS KPYTGEHAKAIGNCPIWVK TPLKLANGTKYRPPAKLLKERGFFGAIAGFLEGGW

359:EGMIAGWHGYTSHGAHGVAVAADLKSTQEAINKITKNLNSLSELEVKNLQRLSGAMDELH 418
:EGMIAGWHGYTSHGAHGVAVAADLKSTQEAINKITKNLNSLSELEVKNLQRLSGAMDELH
:EGMIAGWHGYTSHGAHGVAVAADLKSTQEAINKITKNLNSLSELEVKNLQRLSGAMDELH

419:NEIILELDEKVDDL RADTISSQIELAVLLSNEGI INSEDEHLLALERK LKKMLGPSAVEIG 478
:NEIILELDEKVDDL RADTISSQIELAVLLSNEGI INSEDEHLLALERK LKKMLGPSAVEIG
:NEIILELDEKVDDL RADTISSQIELAVLLSNEGI INSEDEHLLALERK LKKMLGPSAVEIG

479:NGCFETKHKCNQTC LDRIAAGTFNAGEFSLPTFDSL NITAASLNDDGLDNHTILLYYSTA 538
:NGCFETKHKCNQTC LDRIAAGTFNAGEFSLPTFDSL NITAASLNDDGLDNHTILLYYSTA
:NGCFETKHKCNQTC LDRIAAGTFNAGEFSLPTFDSL NITAASLNDDGLDNHTILLYYSTA

539:ASSLAVTLMLAIFIVYMVSRDNVSCSICL 567
:ASSLAVTLMLAIF-----
:ASSLAVTLMLAIF-----
```
