# Supplementary material for: Human Monoclonal Antibodies Broadly Neutralizing against Influenza B Virus
Source: PubMed Central journal article supplement (PMC3567173; doi:10.1371/journal.ppat.1003150), 2013-02-07
Supplement: ppat.1003150.s006.pdf [file ppat.1003150.s006.pdf]

**Table S1.** Pattern of reactivity of HuMAbs.

|      | Isotype | IFA <sup>1</sup> | Western blotting <sup>1</sup> | Target            |
|------|---------|------------------|-------------------------------|-------------------|
| 5A7  | IgG1    | + <sup>2</sup>   | +                             | HA of influenza B |
| 3A2  | IgG3    | +                | - <sup>3</sup>                | HA of influenza B |
| 10C4 | IgG1    | +                | -                             | HA of influenza B |

<sup>1</sup>MDCK cells infected with B/Florida/4/2006, homologous to vaccine antigen.

<sup>2</sup>Positive result.

<sup>3</sup>Negative result.
