# Supplementary material for: Human Monoclonal Antibodies Broadly Neutralizing against Influenza B Virus
Source: PubMed Central journal article supplement (PMC3567173; doi:10.1371/journal.ppat.1003150), 2013-02-07
Supplement: ppat.1003150.s007.pdf [file ppat.1003150.s007.pdf]

**Table S2.** Homology of the epitope region of HuMAb 5A7 among the corresponding sequences derived from NCBI database.

| Sequence                                                                        | Number of strains |                  | Strain name                                                                                                           | Accession number                                             |
|---------------------------------------------------------------------------------|-------------------|------------------|-----------------------------------------------------------------------------------------------------------------------|--------------------------------------------------------------|
|                                                                                 | Yamagata lineage  | Victoria lineage |                                                                                                                       |                                                              |
| <u>I</u> <u>G</u> <u>N</u> <u>C</u> <u>P</u> <u>I</u> <u>W</u> VKT <sup>1</sup> | 1427              | 1399             |                                                                                                                       |                                                              |
| V-----                                                                          | 0                 | 5                | B/California/03/2010,<br>B/Florida/AF2746,<br>B/Florida/AF2747/2010,<br>B/Nairobi/2035/2006,<br>B/Niigata/10F554/2011 | AET21655,<br>ADY16591,<br>ADY16592,<br>ABN71699,<br>AEQ49737 |
| -----R-                                                                         | 2                 | 1                | B/Hawaii/08/2009 (V) <sup>2</sup><br>B/Kisii/6531/2008 (Y),<br>B/Minnesota/08/2009 (Y)                                | AER28587,<br>ACM45921,<br>AER28601                           |
| --D-----                                                                        | 1                 | 2                | B/Parma/1/2003 (V),<br>B/Florida/AF2750/2011 (Y),<br>B/Pucallpa/FLU5716/2007 (V)                                      | CAH56949,<br>ADY16607,<br>ACC59730                           |
| L-----                                                                          | 2                 | 0                | B/Kol/1013/2007,<br>B/Kol/1266/2007                                                                                   | AEA51387,<br>AEG21018                                        |
| -----I-                                                                         | 2                 | 0                | B/Kol/583/2006,<br>B/Kol/667/2006                                                                                     | AEA51386,<br>AEG21015                                        |
| K-----N-                                                                        | 1                 | 0                | B/Kol/1230/2007                                                                                                       | AEA51388                                                     |
| --H-----                                                                        | 1                 | 0                | B/Shanghai/361/2002                                                                                                   | ABP52001                                                     |
| --I-----                                                                        | 0                 | 1                | B/Kol/N2121/2010                                                                                                      | AEG21026                                                     |
| --T-----                                                                        | 0                 | 1                | Influenza B virus                                                                                                     | AAA43692                                                     |
| --Y-----                                                                        | 0                 | 1                | B/Rio Grande do Sul/317/2008                                                                                          | ADG58671                                                     |
| --- <b>F</b> -----                                                              | 1                 | 0                | B/Rio Grande do Sul/314/2008                                                                                          | ADG58665                                                     |
| --- <b>W</b> -----                                                              | 0                 | 1                | B/Xuanwu/1/1982                                                                                                       | AAK68702                                                     |
| -----T-----                                                                     | 1                 | 0                | B/Pennsylvania/11/2007                                                                                                | ACA33432                                                     |
| -----V-----                                                                     | 0                 | 1                | B/Lisboa/7/2002                                                                                                       | ABY71796                                                     |
| -----Q-                                                                         | 0                 | 1                | B/Shanghai/35/1984                                                                                                    | AAK68706                                                     |
| -----K                                                                          | 0                 | 1                | B/Managua/4485.05/2010                                                                                                | AEQ39337                                                     |
| -----P                                                                          | 1                 | 0                | B/Kol/1253/2007                                                                                                       | AEA51390                                                     |

<sup>1</sup>Critical amino acid residues for the epitope of 5A7 are shown in bold and underlined.

<sup>2</sup>(V) is Victoria lineage and (Y) means Yamagata lineage.
